# Supplementary material for: Exploring Cassia mimosoïdes as a promising natural source of steroids with potent anti-cancer, urease inhibition, and antimicrobial properties
Source: Royal Society of Chemistry journal article supplement (doi:10.1039/d3ra08913d), 2024-01-01
Supplement: d3ra08913d1.pdf [file d3ra08913d1.pdf]

## **Exploring *Cassia mimosoides* as a Promising Natural Source of Steroids with Potent Anti-Cancer, Urease Inhibition, and Antimicrobial Properties**

Robert Viani Kepadieu Tchebou<sup>1,2</sup>, Umar Farooq<sup>2,3\*</sup>, Azhar Rasool<sup>4</sup>, Tanveer A. Wani<sup>5</sup>, Seema Zargar<sup>6</sup>, Rizwana Sarwar<sup>2</sup>, Aneela Khushal<sup>2</sup>, Léon Azefack Tapondjou<sup>1</sup>, Syed Majid Bukhari<sup>2</sup>, Seema Zargar<sup>6</sup>, Rémy Bertrand Teponno<sup>1</sup>, Hong-Guang Xu<sup>3</sup>, Sara Khan<sup>2,\*</sup>

## Contents

**Fig. S1.** SAS-RS-APCI spectrum of compound **1**

**Fig. S2.**  $^1\text{H}$  NMR spectrum of compound **1**

**Fig. S3.**  $^{13}\text{C}$  NMR spectrum of compound **1**

**Fig. S4.** DEPT90 spectrum of compound **1**

**Fig. S5.**  $^1\text{H}$  DEPT 135 spectrum of compound **1**

**Fig. S6.** Superposition of DEPT 90, DEPT 135 and  $^{13}\text{C}$  NMR spectrum of compound **1**

**Fig. S7.**  $^1\text{H}$ - $^1\text{H}$  COSY spectrum of compound **1**

**Fig. S8.** HSQC spectrum of compound **1**

**Fig. S9.** HMBC spectrum of compound **1**

**Fig. S10.**  $\text{IC}_{50}$  of compound **2, 4, 5, 7, 10, 11, 12, 14 and 15**

**Fig. S11.** 2D and 3D view of binding interaction of  $\beta$ -glucosidase and compound **1**

**Fig. S12.** 3D view interaction hydrophobicity of compounds **1**

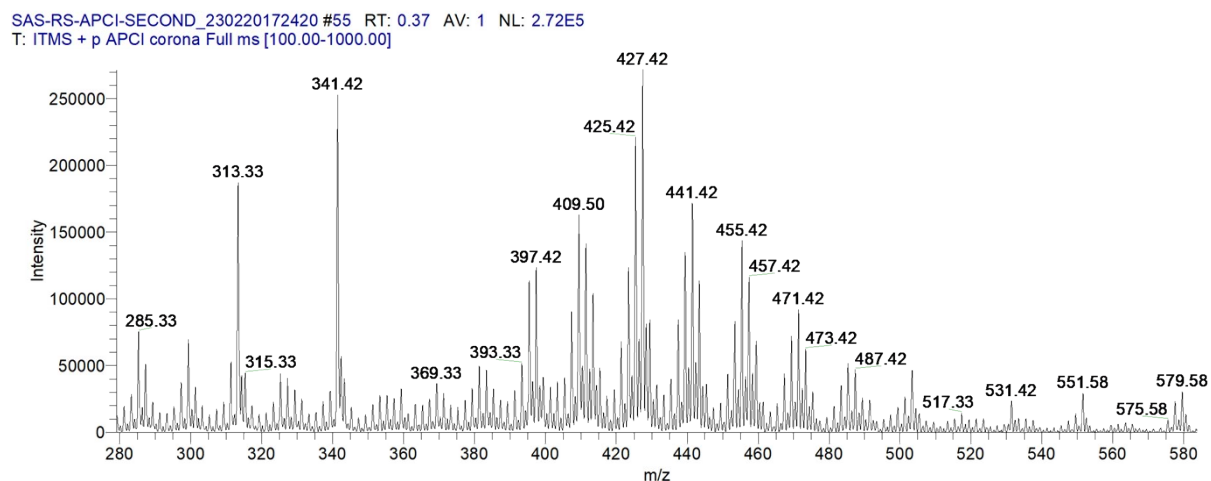

**Fig. S1.** SAS-RS-APCI spectrum of compound **1**

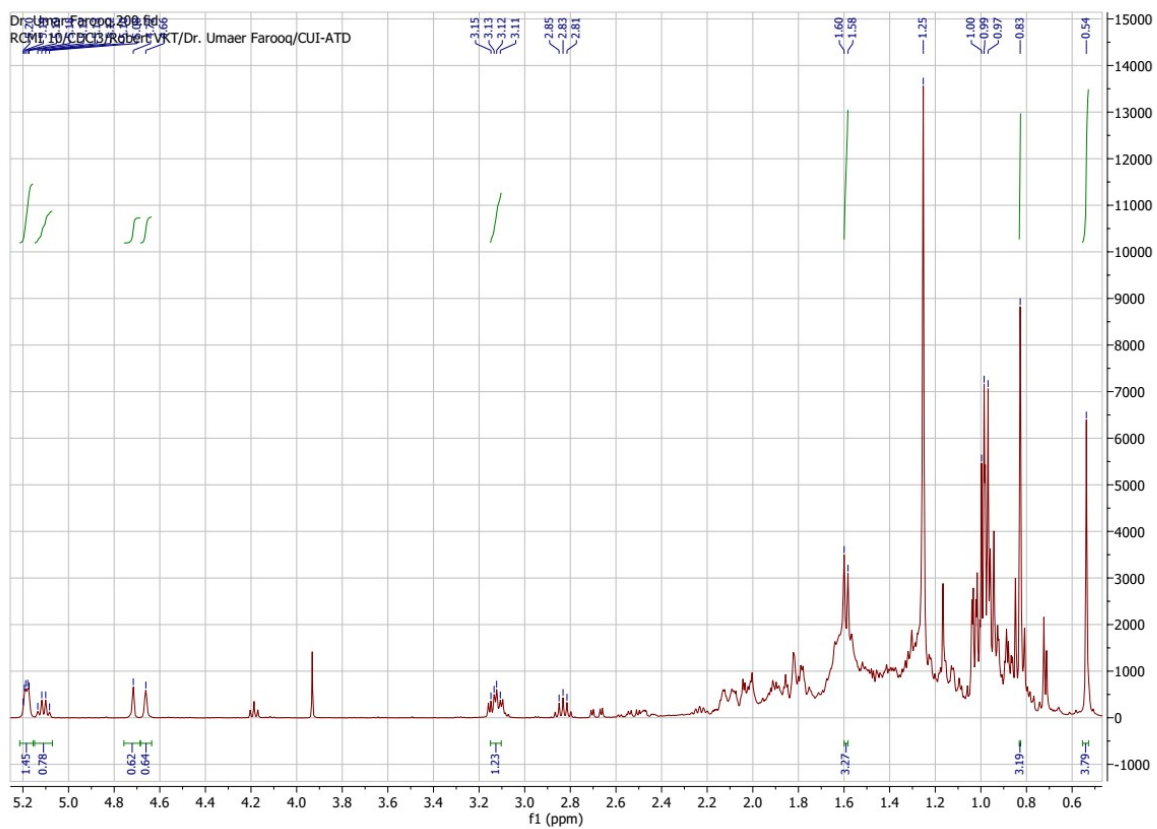

**Fig. S2.**  $^1\text{H}$  NMR spectrum of compound **1**

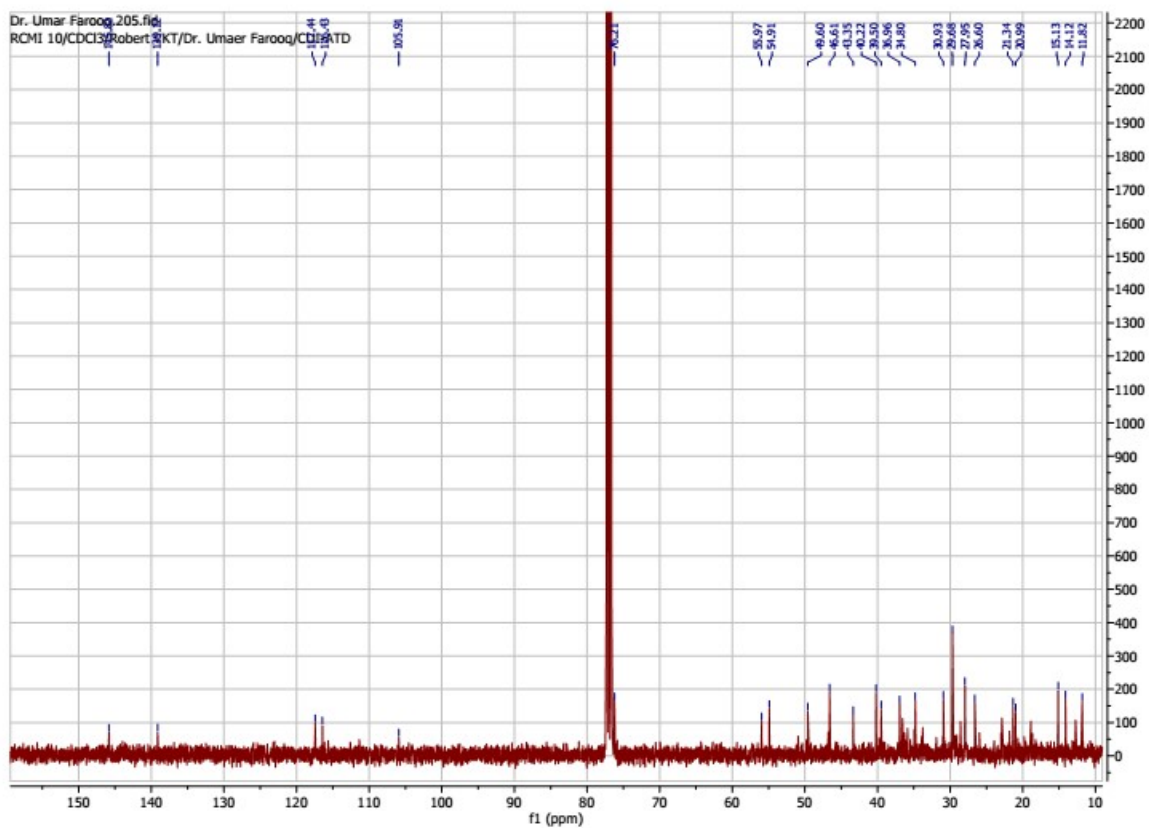

**Fig. S3.**  $^{13}\text{C}$  NMR spectrum of compound **1**

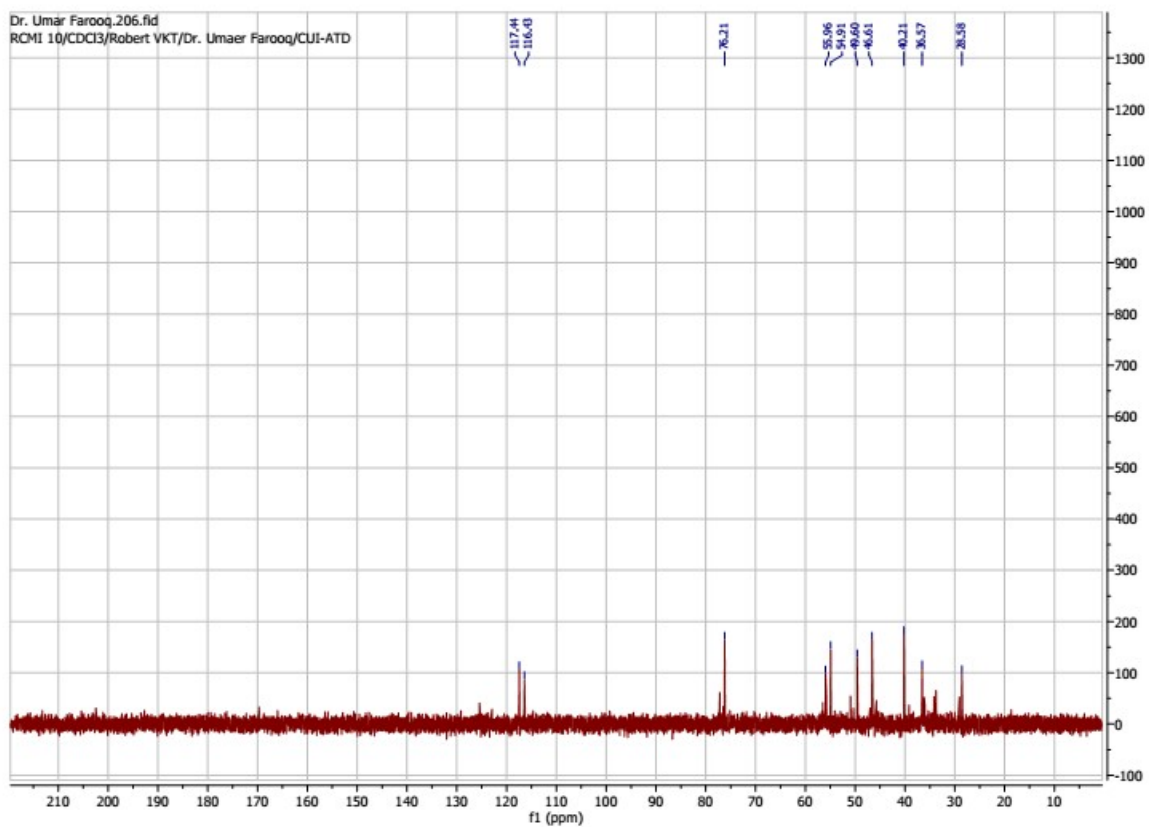

**Fig. S4.** DEPT90 spectrum of compound **1**

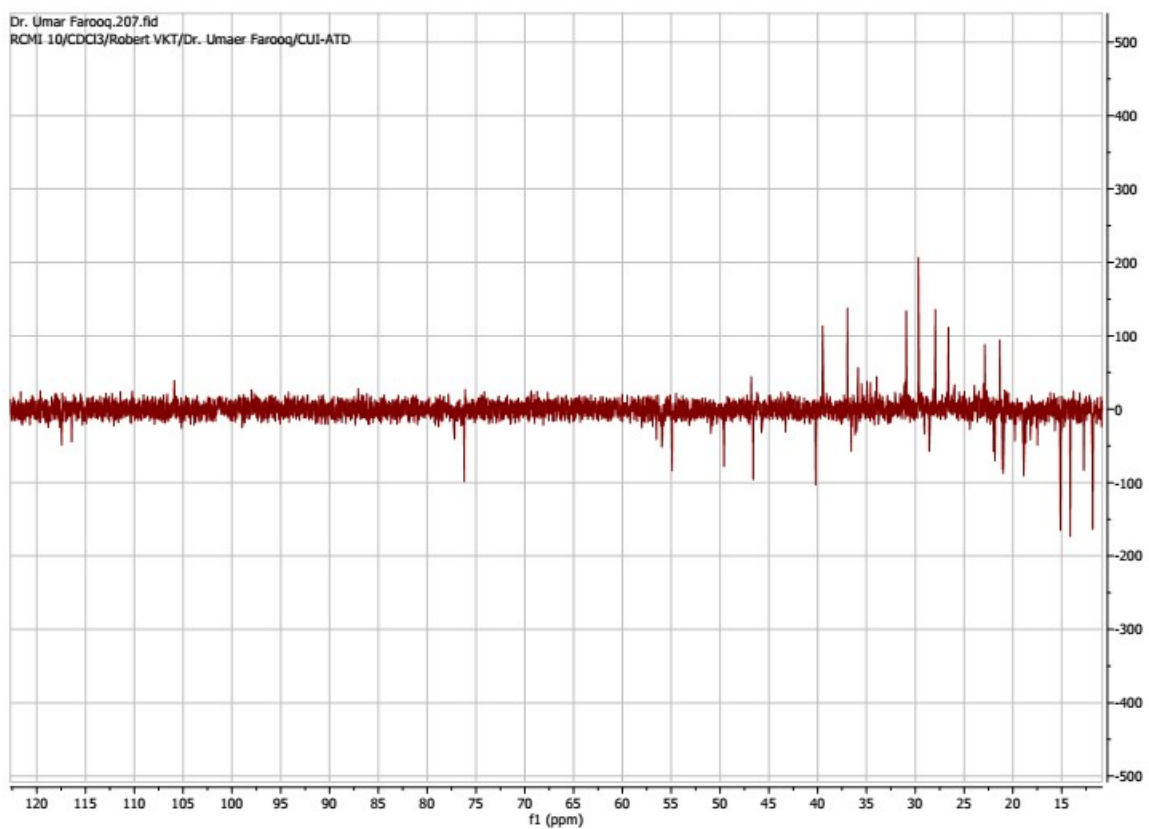

**Fig. S5.** <sup>1</sup>H DEPT 135 spectrum of compound **1**

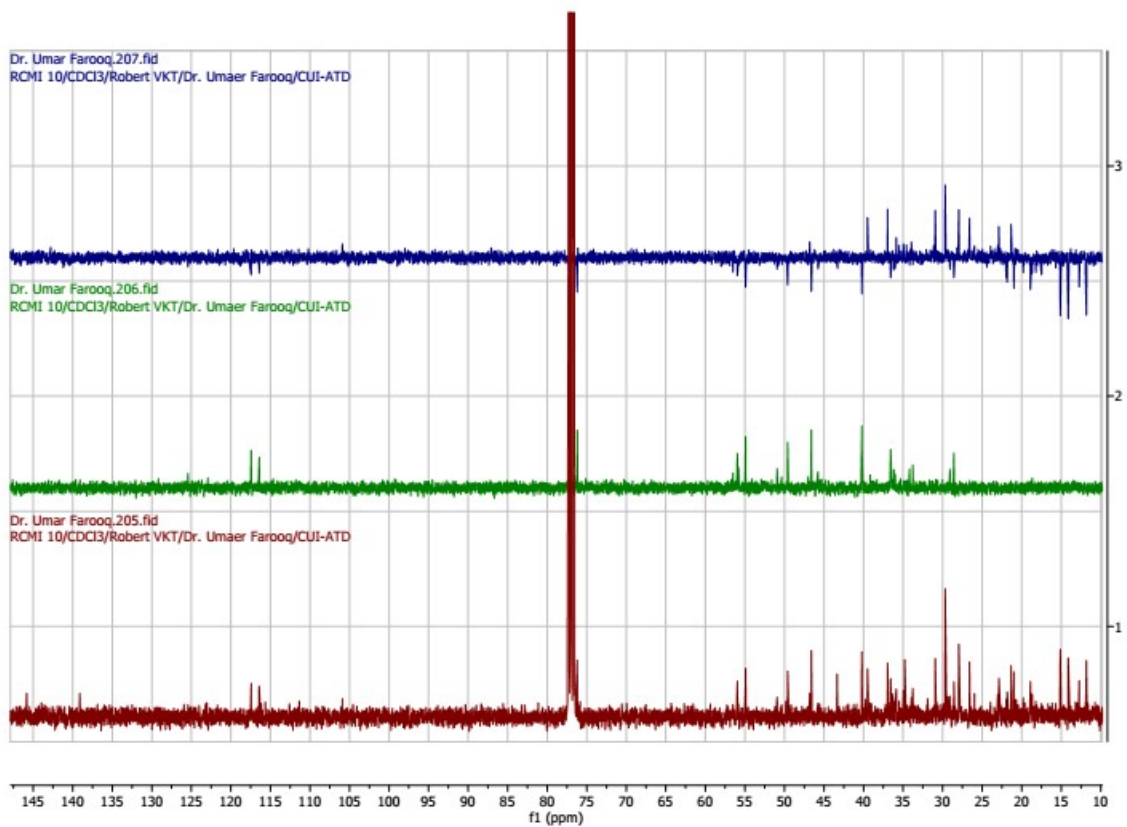

**Fig. S6.** Superposition of DEPT 90, DEPT 135 and <sup>13</sup>C NMR spectrum of compound **1**

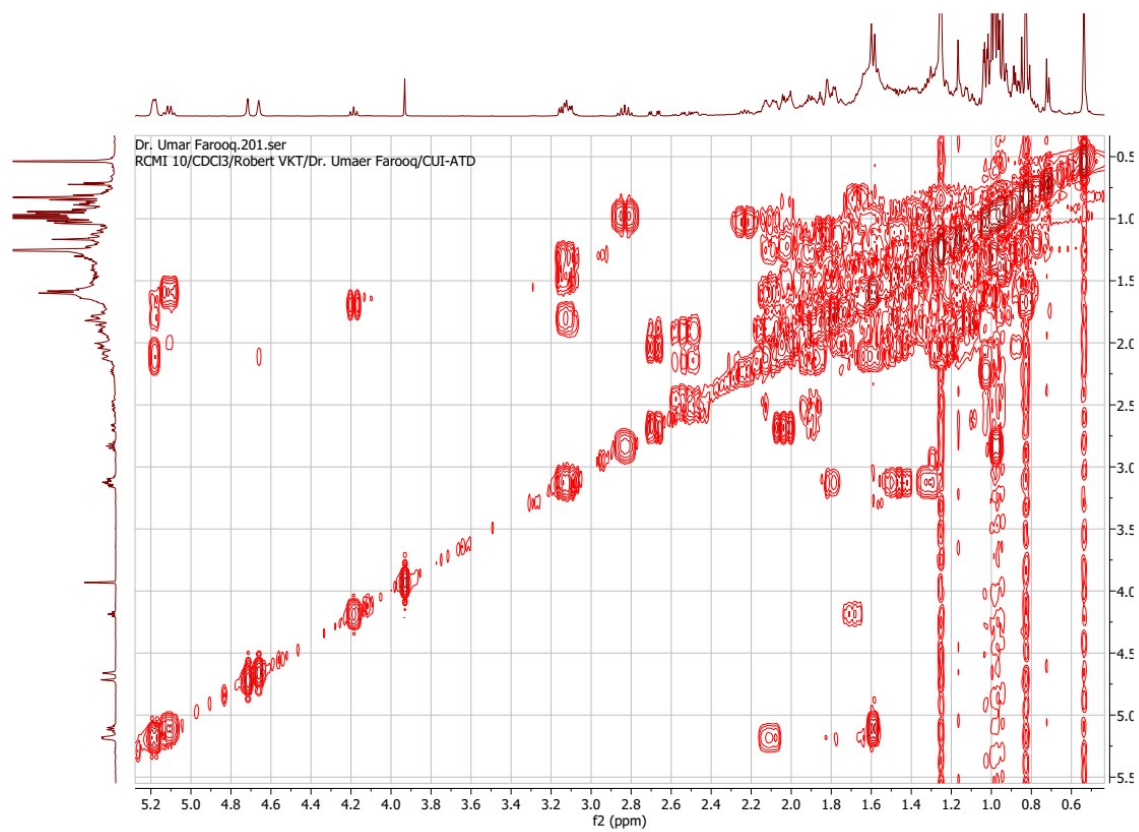

**Fig. S7.** <sup>1</sup>H-<sup>1</sup>H COSY spectrum of compound **1**

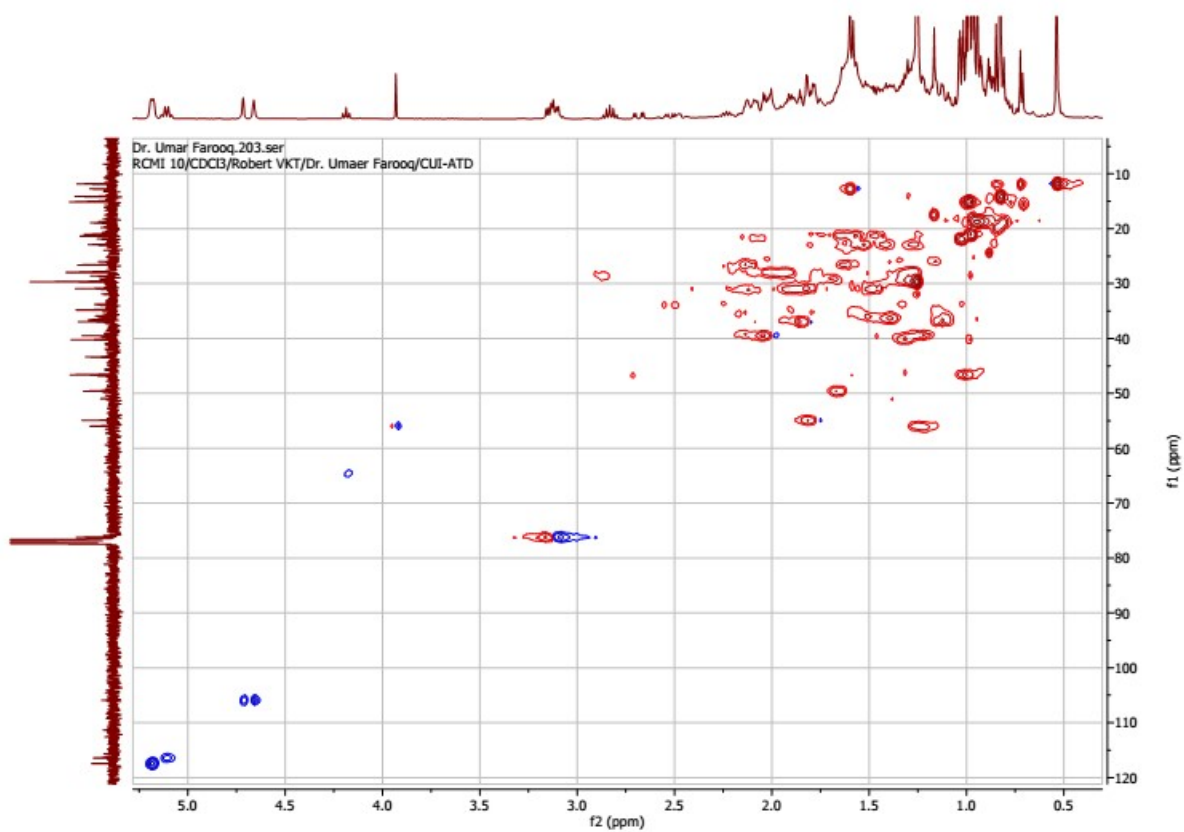

Fig. S8. HSQC spectrum of compound 1

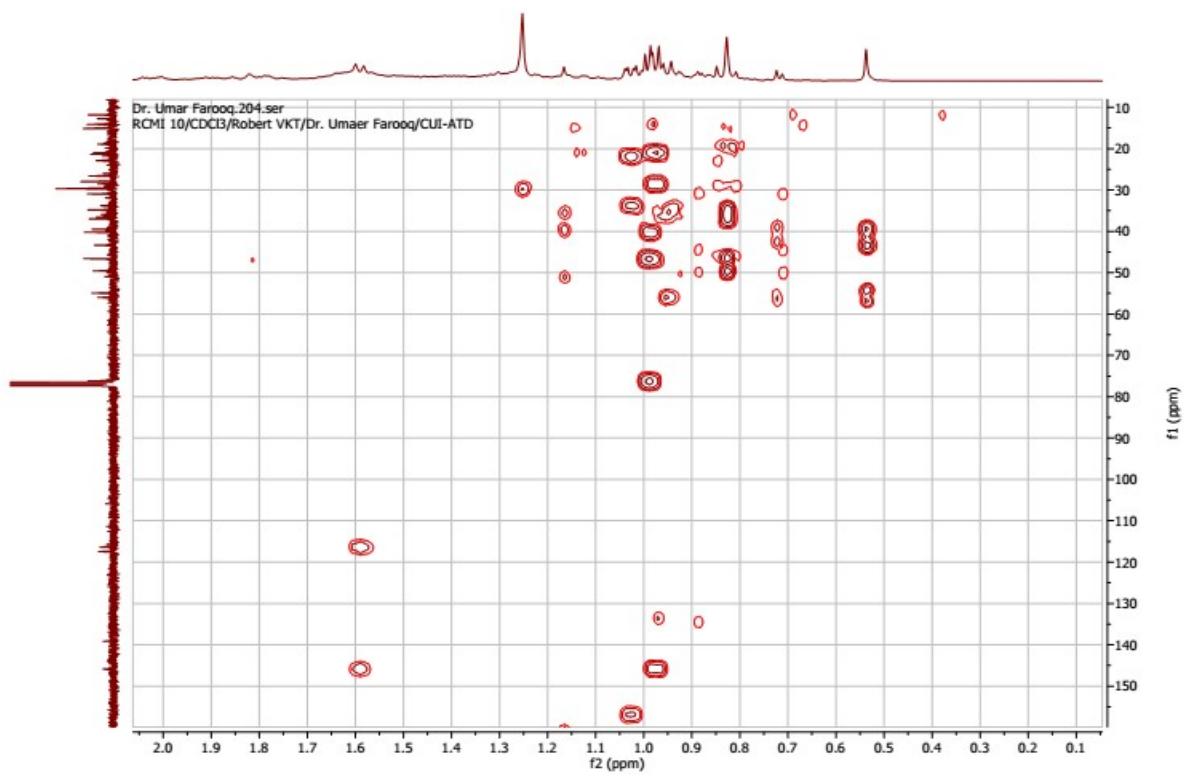

Fig. S9. HMBC spectrum of compound 1

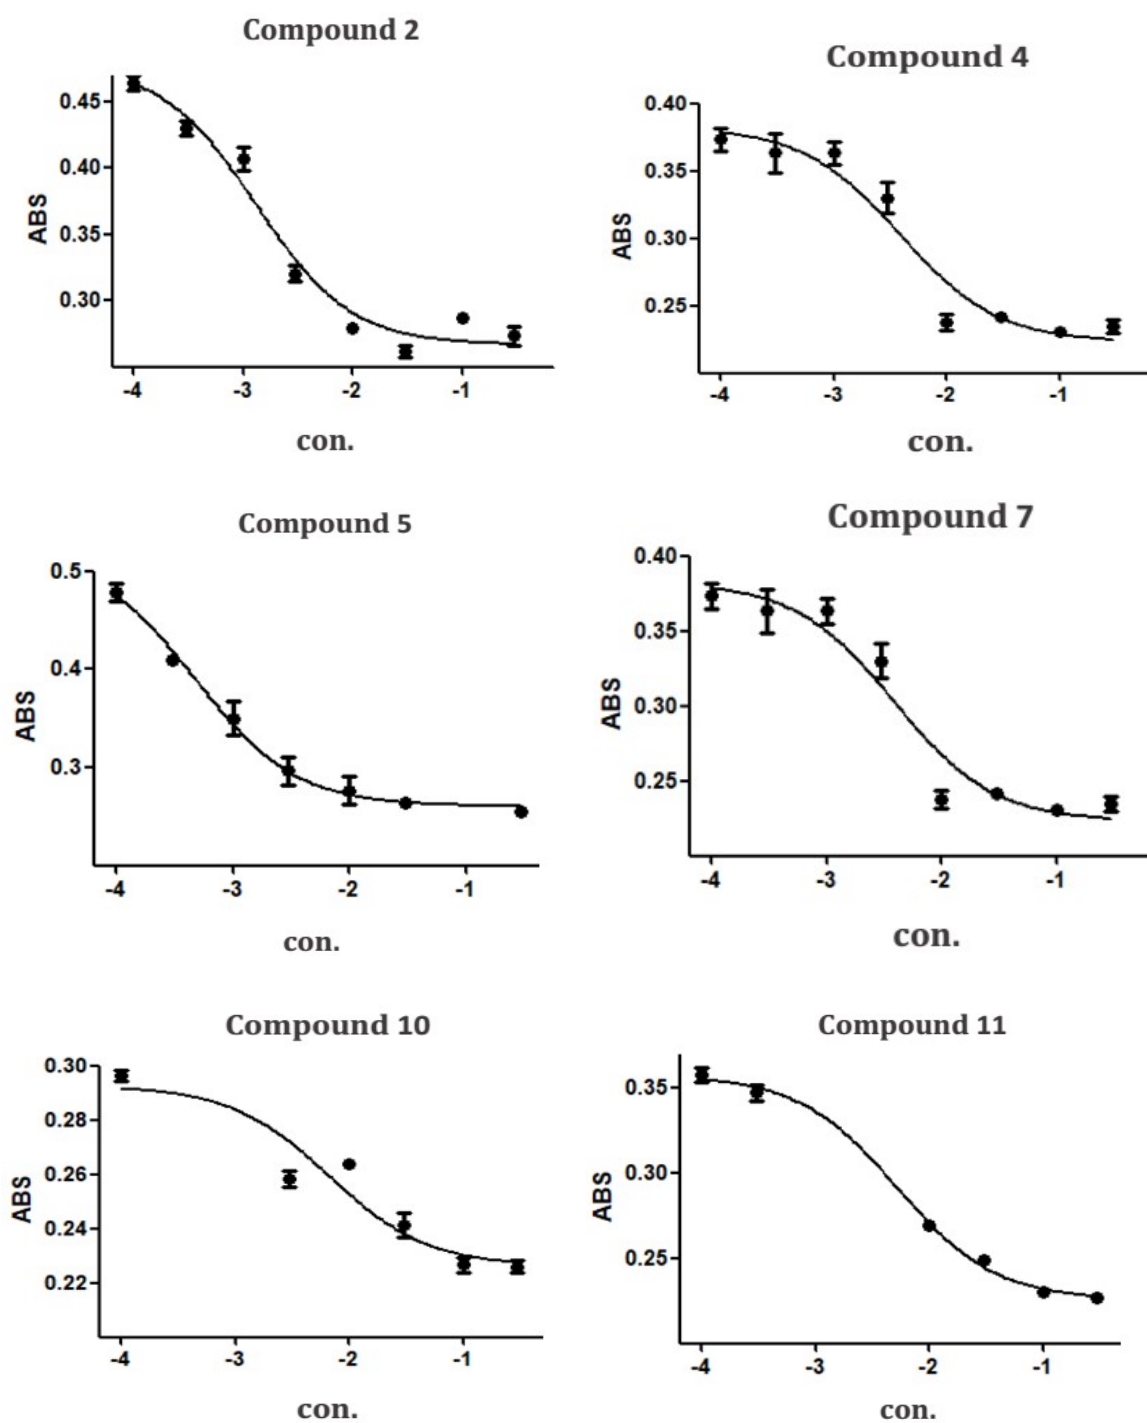

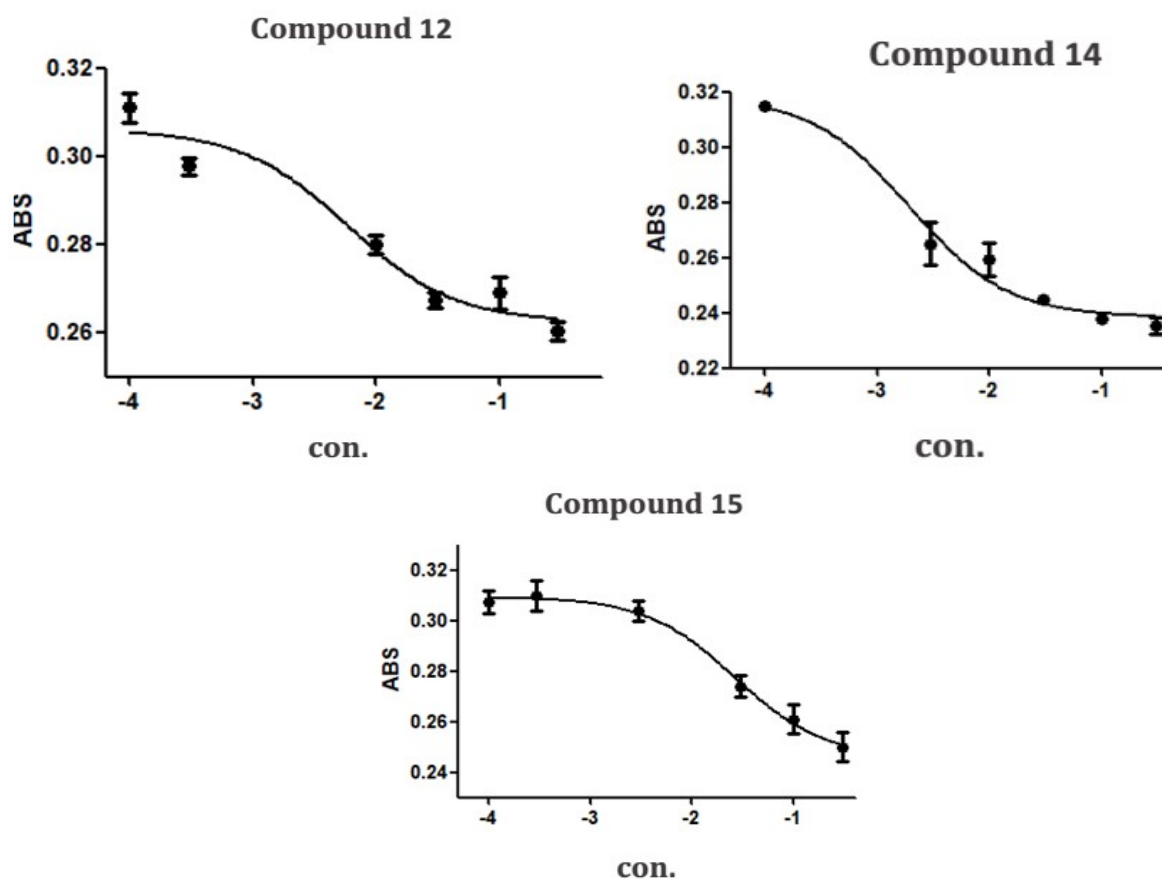

**Table S1:** Binding score and RMSD from urease

| Compound Name                                                     | Binding score (kcal/mol) | RMSD (Å) |
|-------------------------------------------------------------------|--------------------------|----------|
| Luteolin-6- <i>C</i> - $\beta$ -D-glucopyranoside(7)              | -8.79                    | 1.49     |
| Luteolin-8- <i>C</i> - $\beta$ -D-glucopyranoside (6)             | -8.68                    | 1.80     |
| Apigenin-8- <i>C</i> - $\beta$ -D-glucopyranoside (5)             | -8.31                    | 2.09     |
| Nonadecanoic acid (14)                                            | -8.47                    | 1.88     |
| Luteolin-5-methyl ether (4)                                       | -7.84                    | 1.53     |
| Luteolin (2)                                                      | -7.61                    | 0.99     |
| $\beta$ -sitosterol 3- <i>O</i> - $\beta$ -D-glucopyranoside (16) | -7.43                    | 1.84     |
| Butin (8)                                                         | -7.38                    | 1.67     |
| $\beta$ -sitosterol (15)                                          | -6.97                    | 1.37     |
| Stigmat-4-en-3,6-dione (9)                                        | -6.19                    | 1.26     |
| 21-methylene-24-ethylidene lophenol (1)                           | -6.05                    | 2.19     |
| Physine (13)                                                      | -5.84                    | 1.45     |
| Emodin (11)                                                       | -5.59                    | 1.84     |
| Chrysophanol (12)                                                 | -5.51                    | 1,71     |
| 3',4',7-trihydroxyflavone (3)                                     | -5.49                    | 2.32     |
| Stigmast-4-en-3 $\beta$ ,6 $\alpha$ -diol (10)                    | -7.05                    | 1.72     |
| Standard (thiourea)                                               | -3.13                    | 2.15     |



**Table S2:** Antibacterial activity of isolated compounds against bacterial strains. *H.pylori*, *B.subtilis* and *S.aureus*

| <b>Compounds</b>            | <b><i>H.Pylori</i></b> | <b><i>S. aureus</i></b> | <b><i>B. subtilis</i></b> |
|-----------------------------|------------------------|-------------------------|---------------------------|
| 7                           | 1.23                   | 0.78                    | 0.12                      |
| 2                           | 0.21                   | 1.34                    | 0.95                      |
| 14                          | 0.23                   | 2.67                    | 0                         |
| 15                          | 0.95                   | 0.234                   | 0                         |
| 4                           | 0.52                   | 0.42                    | 1.76                      |
| 5                           | 3.24                   | 0.678                   | 2.67                      |
| 11                          | 1.2                    | 0.82                    | 1.78                      |
| 12                          | 3.45                   | 1.78                    | 1.56                      |
| 10                          | 2.24                   | 2.83                    | 0.67                      |
| 1                           | 0.28                   | 0.12                    | 0                         |
| <b>Synthesized compound</b> | 0.24                   | 0.89                    | 0.16                      |
| 6                           | 2.64                   | 3.56                    | 0.19                      |
| 9                           | 0                      | 2.45                    | 0.11                      |
| 13                          | 3.43                   | 1.56                    | 0.17                      |
| 16                          | 2.3                    | 1                       | 1.1                       |
| <b>Ciprofloxacin</b>        | 0.67                   | 0.187                   | 0.75                      |

**Table S3** Results of ADME analyses of the investigated compounds.

| Compounds                      | 1      | 2      | 3      | 4      | 5      | 6      | 7      | 8      | 9      | 10     | 11     | 12     | 13     | 14     | 15     | 16     | THI   | ACE    | ACA    |
|--------------------------------|--------|--------|--------|--------|--------|--------|--------|--------|--------|--------|--------|--------|--------|--------|--------|--------|-------|--------|--------|
| Physicochemical Properties     |        |        |        |        |        |        |        |        |        |        |        |        |        |        |        |        |       |        |        |
| Number of H-Bond Acceptors     | 1      | 6      | 5      | 6      | 10     | 11     | 11     | 5      | 2      | 2      | 5      | 4      | 5      | 2      | 1      | 6      | 0     | 6      | 19     |
| Number of H-Bond Donors        | 1      | 4      | 3      | 3      | 7      | 8      | 8      | 3      | 0      | 2      | 3      | 2      | 2      | 1      | 1      | 4      | 2     | 2      | 14     |
| Molecular Weight (g/mol)       | 424.70 | 286.24 | 270.24 | 300;26 | 432.38 | 448.38 | 448.38 | 272.25 | 426.67 | 430.71 | 270.24 | 254.24 | 284.26 | 298.50 | 414.71 | 576.85 | 76.12 | 222.25 | 645.60 |
| Number of heavy atoms          | 31     | 21     | 20     | 22     | 31     | 32     | 32     | 20     | 31     | 31     | 20     | 29     | 21     | 21     | 30     | 41     | 4     | 13     | 44     |
| Number of aromatic heavy atoms | 0      | 16     | 16     | 16     | 16     | 16     | 16     | 12     | 0      | 0      | 12     | 12     | 12     | 0      | 0      | 0      | 0     | 5      | 0      |
| Fraction C sp <sup>3</sup>     | 0.80   | 0.00   | 0.00   | 0.06   | 0.29   | 0.29   | 0.29   | 0.13   | 0.86   | 0.93   | 0.07   | 0.07   | 0.12   | 0.95   | 0.93   | 0.94   | 0.00  | 0.25   | 0.92   |
| Number of rotatable bonds      | 5      | 1      | 1      | 2      | 3      | 3      | 3      | 1      | 6      | 6      | 0      | 0      | 1      | 17     | 6      | 9      | 0     | 3      | 9      |
| Molar refractivity             | 137.09 | 76.01  | 73.99  | 80.48  | 106.61 | 108.63 | 108.63 | 71.57  | 132.47 | 134.39 | 70.78  | 68.76  | 75.25  | 95.22  | 133.23 | 165.61 | 20.13 | 45.22  | 136.69 |
| TPSA (Å <sup>2</sup> )         | 20.23  | 111.13 | 90.90  | 100.13 | 181.05 | 201.28 | 201.28 | 86.99  | 34.14  | 40.46  | 94.83  | 74.60  | 83.83  | 37.30  | 20.23  | 99.38  | 84.13 | 151.66 | 321.17 |
| Lipophilicity                  |        |        |        |        |        |        |        |        |        |        |        |        |        |        |        |        |       |        |        |
| Ilogp                          | 5.08   | 1.86   | 1.70   | 1.79   | 1.38   | 1.27   | 2.12   | 1.30   | 4.49   | 4.72   | 1.80   | 2.22   | 2.45   | 4.43   | 5.12   | 4.87   | 0.47  | -0.21  | -0.35  |
| XLOGP3                         | 8.86   | 2.53   | 2.91   | 2.31   | 0.21   | -0.15  | -0.15  | 1.94   | 8.37   | 8.09   | 2.72   | 3.53   | 3.04   | 8.75   | 9.34   | 7.74   | -0.83 | -0.26  | -8.53  |
| WLOGP                          | 8.11   | 2.28   | 2.58   | 2.59   | -0.32  | -0.53  | -0.53  | 2.19   | 7.41   | 7.00   | 1.89   | 2.18   | 2.19   | 6.72   | 8.02   | 5.85   | -0.81 | 0.03   | -8.56  |
| MLOGP                          | 6.72   | -0.03  | 0.52   | 0.22   | -2.02  | -2.51  | -2.51  | 0.71   | 5.60   | 5.80   | 0.36   | 0.94   | 0.64   | 4.91   | 6.73   | 3.96   | -1.53 | -2.34  | -6.94  |
| SILICOS-IT                     | 7.01   | 2.03   | 2.52   | 2.55   | 0.33   | -0.14  | -0.14  | 2.05   | 7.33   | 6.15   | 2.55   | 3.04   | 3.07   | 6.57   | 7.04   | 5.02   | 0.54  | -0.33  | -7.69  |
| Consensus logPo/w              | 7.16   | 1.73   | 2.04   | 1.89   | -0.07  | -0.41  | -0.24  | 1.64   | 6.64   | 6.36   | 1.87   | 2.38   | 2.27   | 6.28   | 7.25   | 5.49   | -0.43 | -0.62  | -6.41  |
| Water Solubility               |        |        |        |        |        |        |        |        |        |        |        |        |        |        |        |        |       |        |        |
| ESOL                           | PS     | S      | S      | S      | S      | S      | S      | S      | PS     | PS     | S      | MS     | S      | PS     | PS     | PS     | HS    | VS     | HS     |
| ALI                            | PS     | MS     | MS     | MS     | S      | S      | S      | S      | PS     | PS     | MS     | MS     | MS     | PS     | PS     | PS     | VS    | S      | HS     |
| SILICOS-IT                     | MS     | S      | MS     | MS     | S      | S      | S      | S      | PS     | MS     | S      | MS     | MS     | PS     | PS     | MS     | S     | S      | S      |
| Pharmacokinetics               |        |        |        |        |        |        |        |        |        |        |        |        |        |        |        |        |       |        |        |
| GI Absorption                  | Low    | High   | High   | High   | Low    | Low    | Low    | High   | Low    | Low    | High   | High   | High   | High   | Low    | Low    | High  | Low    | Low    |
| BBB Permeation                 | No     | No     | No     | No     | No     | No     | No     | No     | No     | No     | No     | Yes    | No     | No     | No     | No     | No    | No     | No     |
| Skin permeation, logKp (cm/s)  | -2.60  | -6.25  | -5.88  | -6.49  | -8.79  | -9.14  | -9.14  | -6.58  | -2.96  | -3.18  | -6.02  | -5.34  | -5.88  | -1.91  | -2.20  | -4.32  | -7.35 | -7.84  | -16.29 |

TPSA: Topological Polar Surface Area, GI: Gastrointestinal, BBB: Blood Brain Barrier, IS: Insoluble, PS: Poorly soluble, MS: Moderately soluble, S: Soluble, HS: Highly soluble, VS: Very soluble, THI: Thiourea, ACE: Acetazolamide, ACA: Acarbose

**Table 2S** Results of drug-likeness and medicinal chemistry analyses.

| Compounds           | 1      | 2    | 3    | 4    | 5      | 6      | 7      | 8    | 9      | 10     | 11   | 12     | 13   | 14     | 15     | 16     | THI    | ACE    | ACA    |
|---------------------|--------|------|------|------|--------|--------|--------|------|--------|--------|------|--------|------|--------|--------|--------|--------|--------|--------|
| Drug-likeness       |        |      |      |      |        |        |        |      |        |        |      |        |      |        |        |        |        |        |        |
| Lipinski            | Yes    | Yes  | Yes  | Yes  | Yes    | No     | No     | Yes  | Yes    | Yes    | Yes  | Yes    | Yes  | Yes    | Yes    | Yes    | Yes    | Yes    | No     |
| Ghose               | No     | Yes  | Yes  | Yes  | Yes    | No     | No     | Yes  | No     | No     | Yes  | Yes    | Yes  | No     | No     | No     | No     | No     | No     |
| Veber               | Yes    | Yes  | Yes  | Yes  | No     | No     | No     | Yes  | Yes    | Yes    | Yes  | Yes    | Yes  | No     | Yes    | Yes    | Yes    | No     | No     |
| Egan                | No     | Yes  | Yes  | Yes  | No     | No     | No     | Yes  | No     | No     | Yes  | Yes    | Yes  | No     | Yes    | No     | Yes    | No     | No     |
| Muegge              | No     | Yes  | Yes  | Yes  | No     | No     | No     | Yes  | No     | No     | Yes  | Yes    | Yes  | No     | No     | No     | No     | No     | No     |
| ABS                 | 0.55   | 0.55 | 0.55 | 0.55 | 0.55   | 0.17   | 0.17   | 0.55 | 0.55   | 0.55   | 0.55 | 0.55   | 0.55 | 0.85   | 0.55   | 0.55   | 0.55   | 0.55   | 0.17   |
| Medicinal Chemistry |        |      |      |      |        |        |        |      |        |        |      |        |      |        |        |        |        |        |        |
| PAINS (alerts)      | 0      | 1    | 1    | 1    | 0      | 1      | 1      | 1    | 0      | 0      | 1    | 1      | 1    | 0      | 0      | 0      | 0      | 0      | 0      |
| Brenk (alerts)      | 1      | 1    | 1    | 1    | 0      | 1      | 1      | 1    | 0      | 1      | 0    | 0      | 0    | 0      | 1      | 1      | 1      | 1      | 1      |
| Leadlikeness        | No (2) | Yes  | Yes  | Yes  | No (1) | No (1) | No (1) | Yes  | No (2) | No (2) | Yes  | No (1) | Yes  | No (2) | No (2) | No (3) | No (1) | No (1) | No (2) |
| SAS                 | 6.21   | 3.02 | 2.94 | 3.14 | 5.12   | 5.17   | 5.04   | 3.05 | 6.04   | 6.45   | 2.57 | 2.47   | 2.69 | 2.65   | 6.30   | 8.02   | 1.28   | 3.00   | 7.34   |

ABS: Abbott Bioavailability Score, PAINS: Pan Assay Interference Structures, SAS: Synthetic Accessibility Score.
